# Supplementary material
Source: Springer Nature journal article supplement (https://www.springermedizin.de/resource/supplementary/13256_2011_1862_MOESM4_ESM.pdf/9648620)

A

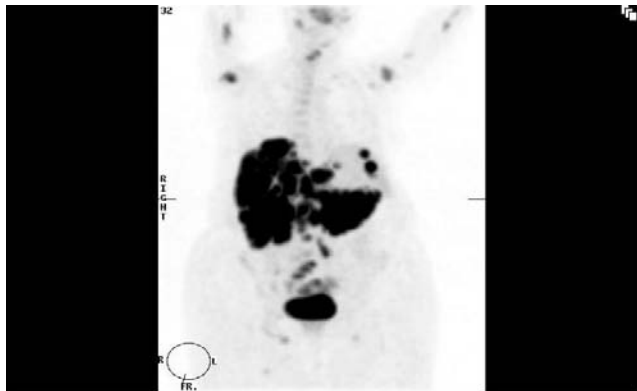

C

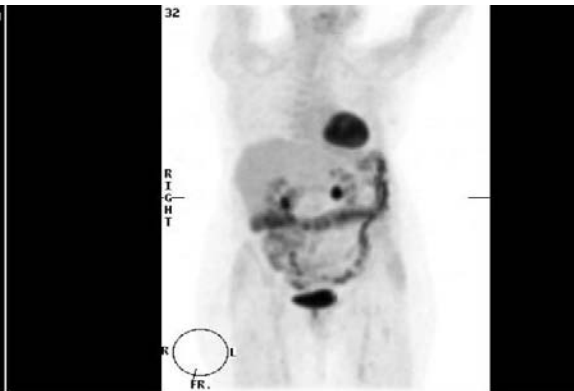

B

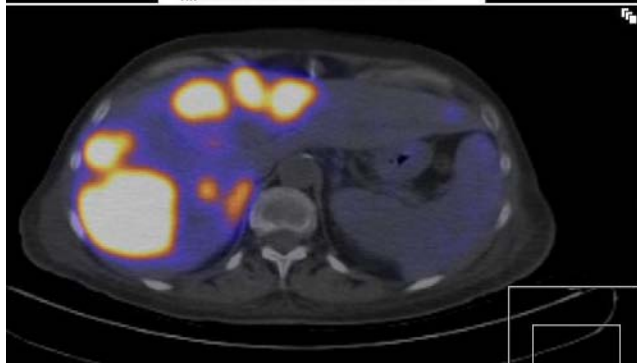

D

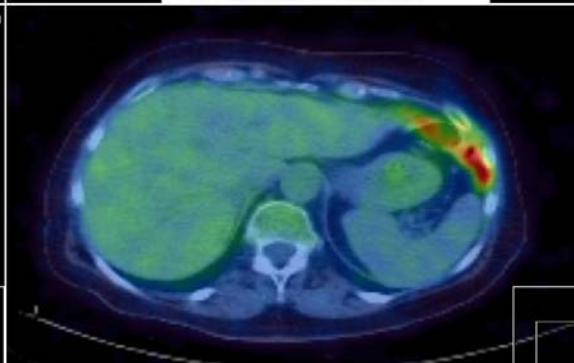

**BEFORE**

**AFTER**

Supplement: MOESM4 [file 9648620]
